# Supplementary material for: Prostaglandin E2 induces Skin Aging via E-prostanoid 1 in Normal Human Dermal Fibroblasts
Source: Preprints.org preprint supplement (doi:10.20944/preprints201910.0305.v1), 2019-10-27
Supplement: Supplementary file 1 [file supplementary]

## Supplementary figure legends

**Supplementary Fig. 1** EP1–EP4 siRNAs significantly decrease their own gene expressions. EP1–EP4 siRNA and control siRNA were transfected into NHDFs. Total RNA was extracted, and qRT-PCR was performed for EP1 (A), EP2 (B), EP3 (C), and EP4 (D). Error bars represent the SD of independent experiments. \* $P < 0.05$  compared to the control. EP, E-prostanoid; siRNA, small interfering RNA; NHDF, normal human dermal fibroblast; qRT-PCR, quantitative reverse transcription polymerase chain reaction; SD, standard deviation.

**Supplementary Fig. 2** EP2–EP4 siRNAs do not affect COL1A1 and MMP1 expression in NHDFs. EP2–EP4 siRNA and control siRNA were transfected into NHDFs. Total RNA was extracted, and qRT-PCR was performed for COL1A1 and MMP1 (A–F). Error bars represent the SD of independent experiments. \*Compared to the control; \*\* $P < 0.05$  compared to siRNA-transfected NHDFs. EP, E-prostanoid; siRNA, small interfering RNA; COL1A1, collagen, type I, alpha 1; MMP1, matrix metalloproteinase 1; NHDF, normal human dermal fibroblast; qRT-PCR, quantitative reverse transcription polymerase chain reaction; SD, standard deviation.
